1 **A novel Hsp90 phospho-switch modulates virulence in the major human**  
2 **fungus pathogen *Candida albicans***

3  
4  
5 Leenah Alaalm<sup>1</sup>, Julia L. Crunden<sup>1,2</sup>, Mark Butcher<sup>3</sup>, Ulrike Obst<sup>2</sup>, Ryann Whealy<sup>2</sup>, Carolyn  
6 E. Williamson<sup>1</sup>, Heath E. O'Brien<sup>4</sup>, Christiane Schaffitzel<sup>5</sup>, Gordon Ramage<sup>3</sup> and Stephanie  
7 Diezmann<sup>1,2\*</sup>

8  
9  
10 <sup>1</sup> Department of Biology & Biochemistry, University of Bath, Bath, United Kingdom

11 <sup>2</sup> School of Cellular and Molecular Medicine, University of Bristol, Bristol, United Kingdom

12 <sup>3</sup> School of Medicine, Dentistry and Nursing, University of Glasgow, Glasgow, United  
13 Kingdom

14 <sup>4</sup> MRC Centre for Neuropsychiatric Genetics & Genomics, Division of Psychological  
15 Medicine & Clinical Neurosciences, Cardiff University, Cardiff, United Kingdom

16 <sup>5</sup> School of Biochemistry, University of Bristol, Bristol, United Kingdom

17  
18  
19 Leenah Alaalm and Julia L. Crunden contributed equally to this work.

20  
21  
22 Running title: Hsp90 phosphorylation modulates *Candida albicans* virulence  
23

## 24 **Abstract**

25 The ubiquitous molecular chaperone Hsp90 is a key regulator of cellular proteostasis and  
26 environmental stress responses. Hsp90 also regulates cellular morphogenesis, drug resistance,  
27 and virulence in human pathogenic fungi, which kill more than 1.6 million patients each year  
28 worldwide. Invasive fungal infections are difficult to treat due to the lack of effective  
29 antifungal therapies, resulting in mortality rates of up to 95%. As a key regulator of fungal  
30 virulence, Hsp90 is an attractive therapeutic target. However, fungal and animal homologs are  
31 highly conserved, impeding fungal-specific targeting. Thus, understanding the factors that  
32 regulate Hsp90 could provide an alternative strategy aimed at exclusively targeting this  
33 regulator of fungal virulence. Here, we demonstrate how CK2-mediated phosphorylation of  
34 two Hsp90 residues modulates virulence in a major fungal pathogen of humans, *Candida*  
35 *albicans*. We combined proteomics, molecular evolution and structural modelling with  
36 molecular biology to identify and characterize two Hsp90 phosphorylation sites.  
37 Phosphorylation negatively affects thermal stress response, morphogenesis, drug  
38 susceptibility and fungal virulence. Our results provide the first record of specific Hsp90  
39 phosphorylation sites acting as modulators of fungal virulence. Post-translational  
40 modifications of Hsp90 could prove valuable in future exploitation as antifungal drug targets.

41

## 42 **Introduction**

43 Fungi kill as many patients as tuberculosis and about three times as many as malaria each  
44 year<sup>1</sup>. One of the most deadly fungal pathogens, *Candida albicans* causes ~750,000 cases of  
45 invasive life-threatening bloodstream infections in immunocompromised patients worldwide  
46 each year<sup>1</sup>, with mortality rates approaching 75%<sup>2</sup>. In addition to high burdens on human life,  
47 fungal infections put a significant strain on health care costs. In 2017, the United States spent  
48 \$4.5 billion on 75,055 hospitalizations necessitated by fungal disease<sup>3</sup> while English NHS  
49 trusts spent more than £90 million on antifungal drugs alone<sup>4</sup>. This already dire situation is  
50 further exacerbated by the ever-growing number of patients at risk of contracting invasive  
51 fungal infections. It is thus imperative to understand the biological principles underpinning  
52 fungal virulence to identify points of fragility suitable for therapeutic targeting.

53 Diverse aspects of fungal pathogenicity are controlled by heat shock protein 90  
54 (Hsp90), a ubiquitous regulator of the cellular protein homeostasis. Hsp90 regulates cell  
55 morphology, drug resistance, and virulence in *C. albicans*<sup>5</sup> and other leading fungal  
56 pathogens of humans *Cryptococcus neoformans*<sup>6</sup>, which causes brain infections and

57 *Aspergillus fumigatus*<sup>7</sup> which targets the lungs, as well as the dermatophyte *Trichophyton*  
58 *rubrum*<sup>8</sup>, and *Sporothrix schenckii*<sup>9</sup>, the causative agent of cutaneous infections. Hsp90's role  
59 in virulence and development is best understood in *C. albicans*, where pharmacological  
60 inhibition or genetic reduction of Hsp90 result in reduced drug resistance in planktonic cells<sup>5</sup>  
61 and biofilms<sup>10</sup>, switching to filamentous growth<sup>11</sup>, induction of same-sex mating<sup>12</sup>, and  
62 delayed cell cycle progression<sup>13</sup>. Although attractive as a drug target for its role in fungal  
63 virulence, Hsp90 is highly conserved between mammals and fungi<sup>14</sup>. High sequence  
64 conservation prohibits specific targeting of fungal Hsp90 and resulted in severe host toxicity  
65 when mice infected with *C. albicans* were treated with Hsp90 inhibitors developed as anti-  
66 cancer therapeutics and antifungal drugs<sup>15</sup>. Thus, understanding fungal-specific regulatory  
67 mechanisms of Hsp90 could provide an alternative therapeutic approach and is consequently  
68 of biological and clinical relevance.

69 Post-translational modifications (PTMs) play a crucial role in regulating Hsp90. Their  
70 impact on chaperone activity, directionality of the chaperone cycle, and binding to co-  
71 chaperones have been extensively studied in mammalian cells and the model eukaryote  
72 *Saccharomyces cerevisiae*<sup>16</sup>. However, examples of Hsp90 PTMs in pathogenic fungi are  
73 limited to the observations that concurrent acetylation of two lysine residues, K30 and K271,  
74 resulted in increased susceptibility to Hsp90 inhibition, morphogenetic alterations, and  
75 impaired macrophage pyroptosis in *C. albicans*<sup>17</sup>, as well as attenuated virulence in *A.*  
76 *fumigatus*<sup>18</sup>. Given the importance of kinases as drug targets<sup>19</sup> and experimental evidence of  
77 phosphorylation regulating most Hsp90 activities, this type of PTM is of particular interest.  
78 Phosphorylation negatively affects the chaperone cycle, interactions with clients and co-  
79 chaperones, conformational switching, and sensitivity to Hsp90 inhibitors<sup>20</sup>. The ubiquitous  
80 tetrameric casein kinase 2 (CK2), one of several kinases targeting Hsp90, phosphorylates  
81 Hsp90<sup>T36</sup> in mammalian cells and Hsp90<sup>T22</sup> in *S. cerevisiae*. This highly conserved residue  
82 was initially identified as critical for the survival of elevated temperatures<sup>21</sup> and  
83 phosphorylation of T<sup>22/36</sup> reduces kinase client stability and co-chaperone binding<sup>22</sup>. In *C.*  
84 *albicans*, CK2 phosphorylates Hsp90 serine and threonine residues<sup>23</sup>. Yet, specific Hsp90  
85 residues targeted by CK2 and the functional consequences thereof have not been found.

86 Here we demonstrate that CK2-mediated phosphorylation of the newly identified Hsp90  
87 residue S530 blocks *C. albicans* virulence and expression of virulence-related traits, such as  
88 cellular morphogenesis and survival of thermal stress. Probing the conserved T22 residue  
89 revealed that any alteration of this residue leads to loss of Hsp90 function. Our results

90 emphasize the importance of Hsp90 phospho-regulation in fungal virulence and provide a  
91 potential site for future therapeutic targeting.

92

## 93 **Results**

94 **Mapping, modeling, and evolutionary history of CK2 Hsp90 phosphorylation sites.** To  
95 map CK2 phosphorylation sites in *C. albicans* Hsp90 *in situ*, the wild-type strain and four  
96 mutants, each lacking one CK2 subunit (for strain construction see Tables S1, S2, S3, and  
97 Supplementary Information), were grown in rich media at 30°C upon which epitope tagged  
98 Hsp90 was purified and analyzed by mass spectrometry. Without further enrichment, Hsp90  
99 sequence coverage in trypsin digests was 70% or higher and ranged between 40-45% in  
100 endoproteinase Glu-C digests. Three phosphorylation sites were identified (Table 1). S279  
101 was only phosphorylated in the *cka1Δ/Δ* mutant. S294 was phosphorylated in the wild type  
102 and all four CK2 mutants. S530 was phosphorylated in the wild type, the *cka1Δ/Δ* and the  
103 *ckb1Δ/Δ* mutants, but not the *cka2Δ/Δ* and *ckb2Δ/Δ* mutants. Interestingly, deletion of *CKA2*  
104 results in increased fluconazole resistance<sup>24</sup>, while Hsp90 inhibition abolishes fluconazole  
105 resistance<sup>25</sup>.

106 Thus, we hypothesized that phosphorylation of Hsp90<sup>S530</sup> blocks Hsp90 function,  
107 thereby reducing resistance to antifungal drugs. The acquisition of a PTM that reduces drug  
108 resistance appears counter-intuitive, but the trade-off theory of optimal virulence predicts  
109 selective pressure to evolve reduced virulence in cases where the host and pathogen's fitness  
110 are aligned<sup>26</sup>. *C. albicans*'s primary ecological niche is as a commensal on mucosal surfaces  
111 of the oral cavity and GI tract. To test this, we assessed the effect of Hsp90<sup>S530</sup>  
112 phosphorylation on diverse virulence traits, including high temperature growth and  
113 morphogenesis.

114 In addition to investigating S530, we decided to also characterize the conserved CK2  
115 target Hsp90<sup>T22/T36</sup>, whose *C. albicans* homolog is T25, called T25 henceforth. T25 resides in  
116 a highly conserved region of Hsp90's N-terminus, which contains the ATP binding site and is  
117 the target of the Hsp90 inhibitors geldanamycin and radicicol<sup>27</sup>. S530 is located in a highly  
118 divergent region of the Hsp90 middle domain, where client proteins bind<sup>27</sup> (Fig. 1a). To  
119 elucidate the relationship of these two residues within the Hsp90 molecule, we modeled the  
120 full-length *C. albicans* Hsp90 monomer on the *S. cerevisiae* crystal structure<sup>28</sup> (Fig. 1b). A  
121 total of 609 residues (94% coverage) were aligned with 100% confidence, sharing 89%  
122 identity between both yeast species. The homology model revealed that both residues are

123 located in loop regions without secondary structural elements (Fig. 1b). T25 resides in close  
124 proximity to the ATP binding pocket, while S530 is located in a loop near the protein's C-  
125 terminus. The surface model shows that T25, although not a hydrophobic amino acid, is not  
126 solvent exposed, while S530 is (Fig. 1b). These observations are in keeping with molecular  
127 evolution theory, which predicts that decreased solvent accessibility results in fewer amino  
128 acid polymorphisms<sup>29</sup> and thus higher sequence conservation.

129         Given the divergent nature of the S530 residue (Fig. 1a), we investigated its  
130 evolutionary history within the fungal kingdom, asking if *C. albicans* presented a unique case  
131 or if multiple transitions could be detected. Aligning 659 amino acids of 240 fungal Hsp90  
132 sequences, representing nine sub-phyla, with the murine homolog Hsp90ab1 revealed serine  
133 to be a derived allele originating at least eleven times independently within the Dikarya,  
134 which encompass the Ascomycota and Basidiomycota, and represent ~96% of known fungal  
135 species<sup>30</sup> (Fig. 1c, S1, Table S4). Basal fungi, such as the Chytridiomycota, share an aspartic  
136 acid allele with animal cytosolic Hsp90. Threonine originated in the last common ancestor of  
137 the Dikarya and threonine to serine transitions were detected in five of the six sub-phyla.  
138 Serine alleles were detected in species considered plant pathogens (*Ustilago hordei*, *Puccinia*  
139 complex, *Aspergillus niger*, *Ashbya gossypii*), species associated with trees (*Neolecta*  
140 *irregularis*), fermentative yeast (*Nadsonia fulvescens*), methylotrophic yeasts (*Komagataella*  
141 *phaffi*, *K. pastoris*, *Ogataea parapolyomorpha*, *O. polymorpha*), halo-tolerant species  
142 (*Debaryomyces hansenii*, *Zygosaccharomyces rouxii*) and the opportunistic pathogens  
143 (*Meyerozyma guilliermondii*, *Malassezia globosa*, *Candida parapsilosis*). No serine alleles  
144 were detected amongst the 82 Agaromycotina, which include the human pathogen  
145 *Cryptococcus neoformans* as well as mushrooms and jelly fungi. In summary, the serine allele  
146 is rare; it is present in less than 5% of fungi. Serine occurs in species that are capable of  
147 causing disease in plants, thrive in extreme environments, and exist as commensals of the  
148 human body where they can cause opportunistic infections in responses to changes in the  
149 host's immune status, like *C. albicans*.

150 **Hsp90 phosphorylation negatively affects protein stability and co-chaperone binding.** To  
151 investigate the effects of phosphorylation of T25 and S530 and to accommodate the 'obligate  
152 diploid' nature of *C. albicans*, we generated strains expressing one mutant *hsp90* allele, where  
153 the relevant residue was replaced with either a phosphomimetic glutamic acid (E) or a non-  
154 phosphorylatable alanine (A) while the remaining *HSP90* wild-type allele was placed under  
155 the control of the maltose-inducible promoter *MAL2p* (Tables S1, S2, S3, Supplementary

156 Information). Consequently, strains grown in dextrose solely expressed the mutant allele,  
157 thereby revealing the effects of phosphorylation. Growth in maltose resulted in expression of  
158 the wild-type allele, serving as control and for strain maintenance. Non-phosphorylatable and  
159 phosphomimetic alleles were created for both residues (T25A, T25E, S530A, S530E) and  
160 compared to the wild type and the *MAL2-HSP90* promoter control, that carries two *HSP90*  
161 wild-type alleles, one of which is under the control of the *MAL2* promoter.

162 To test if phosphorylation affects Hsp90 stability, strains were grown in dextrose or  
163 maltose and cell extracts probed for Hsp90 using an antibody that recognizes amino acid  
164 residues 693-702 in the *C. albicans* Hsp90 C-terminus<sup>31</sup>. Replacing T25 or S530 with the  
165 phosphomimetic residue (E) almost completely depleted Hsp90 levels in cells grown in  
166 dextrose when compared to the *MAL2-HSP90* control. Protein levels remained comparable in  
167 the strains carrying the non-phosphorylatable alanine allele (A) (Fig. 2a). Thus,  
168 phosphorylation of T25 or S530 destabilizes Hsp90.

169 Given the importance of T22/T36 for co-chaperone binding in *S. cerevisiae* and  
170 mammalian cells<sup>32</sup>, we aimed to determine if the homologous T25 residue plays a similar role  
171 in *C. albicans*. Cell lysates from strains with TAP or HA tagged co-chaperones were  
172 immunoprecipitated with IgG or  $\alpha$ -HA agarose and probed for presence of co-chaperones  
173 Cdc37, Aha1, Sba1, and Sti1, which bind to Hsp90's N-terminal domain<sup>33</sup>, and for co-  
174 immunoprecipitated Hsp90 (Fig. 2b). Changing T25 to either a phosphomimetic or non-  
175 phosphorylatable form severely reduced binding of Hsp90 to all four co-chaperones,  
176 indicating functional conservation of T25 with regards to co-chaperone binding.

177 **Hsp90 phosphorylation blocks expression of key virulence traits.** Mutational analysis of  
178 the *S. cerevisiae* homolog *HSP82* revealed T22 to be essential for survival of elevated  
179 temperatures<sup>34</sup>, a key virulence trait. To determine the importance of T25 and S530 for  
180 growth at high temperatures in *C. albicans*, *hsp90* mutants as well as the wild-type and  
181 promoter control strains were spotted onto medium containing either dextrose or maltose and  
182 exposed to different temperatures (Fig. 3a). Although neither T25 mutant grew as robust as  
183 the wild type or the *MAL2-HSP90* control, the phosphomimetic T25E grew better than the  
184 non-phosphorylatable T25A at temperatures above 25°C. Single colonies were detectable for  
185 T25E at the highest dilutions even at 37°C and 39°C. Growth of T25A was only detectable at  
186 the lowest dilutions at elevated temperatures. In either strain, however, colonies were visibly  
187 smaller than in the control suggesting reduced growth rate due to alterations of the T25  
188 residue. Growth of the non-phosphorylatable S530A mutant was comparable to the control

189 strains but the phosphomimetic S530E mutant grew much less robust especially at lower  
190 temperatures. This suggests phosphorylation of T25 and S530 plays different roles during  
191 exposure to thermal stress. Phosphorylation of T25 is required for survival of high  
192 temperatures, while phosphorylation of S530 impairs the cell's ability to cope with lower  
193 temperatures.

194         Given the importance of Hsp90 in *C. albicans* antifungal drug resistance and the role of  
195 Hsp90 PTMs in susceptibility to pharmacological inhibition of Hsp90 function, we tested the  
196 phospho-mutants for susceptibility to the commonly used antifungal drug fluconazole and the  
197 Hsp90 inhibitor radicicol. Control and phospho-mutant strains were exposed to drug gradients  
198 ranging from either 0-256  $\mu\text{g/ml}$  for fluconazole or 0-25  $\mu\text{g/ml}$  for radicicol. Growth was  
199 quantified after 48 hours at 25°C as optical density revealing that expression of *hsp90* mutant  
200 alleles sensitizes *C. albicans* to antifungal drug treatment and Hsp90 inhibition (Fig. 3b).  
201 Changing T25 to either a phosphomimetic or non-phosphorylatable allele or expressing the  
202 S530 phospho-allele rendered *C. albicans* susceptible to either drug. This suggests Hsp90  
203 phosphorylation to be a determinant of drug susceptibility.

204         Cellular morphogenetic diversity is a fundamental element of *C. albicans*' virulence  
205 repertoire as the ability to switch between yeast and hyphae is essential for the infectious  
206 process<sup>35</sup>. To determine how phosphorylation of T25 or S530 affects cellular morphogenesis,  
207 the wild type, the *MAL2-HSP90* control and the *hsp90* mutants were grown in standard non-  
208 filament inducing conditions in rich media at 30°C. Microscopic examination of planktonic  
209 cells showed robust hyphal growth in both T25 mutants as well as the S530E strain in media  
210 containing dextrose, but not maltose (Fig. 3c). To quantify these observations, we calculated  
211 the morphology index (MI) for 100 randomly selected cells for each strain (Fig. S2). An MI >  
212 1 is indicative of cell elongation or hyphal growth. MI scores for cells grown in dextrose or  
213 maltose differed significantly for both T25 mutants and S530E. In maltose, MIs clustered  
214 below 1, in dextrose MIs ranged from ~0.2 to ~75. Hence, both T25 mutant alleles and the  
215 phosphomimetic S530E allele cause cells to switch from yeast to hyphal growth.

#### 216 **Hsp90's phosphorylation status affects colony appearance and biofilm viability.**

217 Following up on the observation that differential Hsp90 phosphorylation results in elongated  
218 cell shape, we assessed macroscopic changes to colony morphology and response to cell wall  
219 stress. To capture changes in colony morphology, all strains were grown on nutrient-limited  
220 RPMI, synthetic defined (SD) media alone and supplemented with Calcofluor White or  
221 Congo Red as well as Spider media, which induces the yeast-to-hyphae transition (Table S5).

222 Upon visual inspection of plates grown for 48 hours at 30°C, wild-type colonies were  
223 indistinguishable from the *MAL2-HSP90* control (Fig. 4). Colonies for both T25 mutants and  
224 the S530E strain appeared different from controls on RPMI and SD media. Despite being  
225 highly filamentous on a cellular level, colonies of these strains lost their hyphal edge on  
226 RPMI. On SD, these colonies were wrinkly rather than smooth. Growth on maltose restored  
227 wild type-like growth on RPMI and, to a degree, on SD media. No appreciable differences  
228 were observed for colonies grown in the presence of Congo Red or Calcofluor White when  
229 compared to SD only media (data not shown). Differences in colony morphology on Spider  
230 media appeared to be driven by the carbon source rather than a strain's *HSP90* allele.

231 Morphogenetic diversity is a key prerequisite for the formation of *C. albicans* biofilms,  
232 which are medically relevant for two reasons. First, biofilms act as reservoirs that  
233 continuously feed the infection, and secondly they are intrinsically resistant to treatment with  
234 antifungal drugs<sup>36</sup>. To determine if Hsp90's phosphorylation status affects the intricate  
235 developmental program underlying biofilm formation, cells were grown in standard biofilm-  
236 inducing conditions in RPMI (2 g/l glucose) at 37°C. Mature biofilms were imaged using  
237 scanning electron microscopy and their cell viability and biomass were quantified employing  
238 spectrometric approaches. Microscopic analysis of biofilm architecture at 800x and 8,000x  
239 magnifications showed that control strains and phospho-mutants form structurally similar  
240 biofilms, suggesting that Hsp90's phosphorylation status does not fundamentally affect  
241 overall biofilm development in the conditions tested (Fig. 5a). More detailed inspection of  
242 biomass production and cell viability revealed that the latter is significantly decreased in the  
243 S530E mutant ( $p=0.00205$ ) relative to the *MAL2-HSP90* control (Fig. 5b, c). This is in  
244 keeping with previous observations of phosphorylation of Hsp90<sup>S530</sup> resulting in a loss-of-  
245 function phenotype. All other phospho-mutants displayed significant increases in cell viability  
246 (T25A:  $p=4.01 \times 10^{-14}$ ; T25E:  $p=9.94 \times 10^{-13}$ ; S530A:  $p=8.68 \times 10^{-7}$ ). While deviating from our  
247 observation of a growth defect in the T25 mutants at 37°C on YPD agar, Azadmanesh *et al.*  
248 have shown that the physical environment influences *C. albicans* gene expression and  
249 development<sup>37</sup>.

250 Building on our finding that Hsp90's phosphorylation status determines its effect on *C.*  
251 *albicans* cellular morphogenesis, we demonstrated that phosphorylation of S530 results in  
252 changes in colony morphology and reduced biofilm cell viability due to loss of Hsp90  
253 function. Any manipulation of the T25 residue, however, leads to elongated cells, aberrant  
254 colony morphology and increased biofilm cell viability.



255 **S530 regulates *C. albicans* virulence in an invertebrate model of fungal pathogenesis.**

256 Once we established the importance of phosphorylation of S530 and T25 in virulence-relevant  
257 traits using different *in vitro* assays, we aimed to determine if and how Hsp90  
258 phosphorylation affects fungal virulence. To test this, *Manduca sexta* caterpillars, an  
259 invertebrate model host of fungal disease<sup>38</sup>, were infected with 10<sup>7</sup> yeast cells. Caterpillar  
260 survival was then assessed in groups of ten after 16 hours of incubation at the physiologically  
261 relevant temperature of 37°C. Strain S530E displayed significantly reduced virulence  
262 compared to the *MAL2-HSP90* control (Table S6). Nine caterpillars infected with S530E  
263 survived compared to two caterpillars infected with *MAL2-HSP90* (p=0.0054775). Thus,  
264 S530 phosphorylation blocks Hsp90 function, thereby attenuating virulence in an animal host.

265 In summary, Hsp90's phosphorylation status affects fungal virulence. Taken together,  
266 our results suggest that S530 is a novel phospho-switch. When phosphorylated, it blocks  
267 Hsp90 function and thus the expression of virulence traits, which may aid its adaptation to a  
268 commensal lifestyle while maintaining the ability to cause invasive infections. Alterations of  
269 T25, however, are important beyond phosphorylation, suggesting this residue to be a 'switch  
270 point', important for structural integrity of *C. albicans* Hsp90.

271

272 **Discussion**

273 Our data indicate that CK2-mediated phosphorylation of Hsp90<sup>S530</sup> blocks expression of  
274 virulence traits in a major human pathogen while any alteration of Hsp90<sup>T25</sup> resulted in a loss-  
275 of-function phenotype. This suggests that S530 is a novel *C. albicans* Hsp90 phospho-switch  
276 while T25 acts as switch point.

277 Similarly, to what has been observed in *S. cerevisiae* and mammalian cells, any  
278 modification of *C. albicans* T25 negatively affects co-chaperone binding, survival of high  
279 temperatures, and susceptibility to drug and Hsp90 inhibition<sup>32,39</sup>. We thus propose that T25  
280 acts as a switch point in *C. albicans* Hsp90. Switch points impact on the overall conformation  
281 and function of a protein through conformational disturbances altering chaperone function<sup>40</sup>.  
282 These types of allosteric PTMs are of evolutionary significance as they expand the  
283 proteome's complexity and facilitate dynamic responses to a large number of stimuli without  
284 the need for additional genes<sup>41</sup>. The effect, however, appears to be restricted to T22 in *S.*  
285 *cerevisiae* and T25 in *C. albicans*, as changes in the acetylation status of the neighboring  
286 conserved *C. albicans* K30<sup>17</sup> or *S. cerevisiae* K27<sup>42</sup> residues did not result in loss of Hsp90  
287 function.

288 Detection of phosphorylation of S530 has remained rather elusive. Only one<sup>43</sup> of five  
289 global phospho-proteomic analyses of *C. albicans*<sup>44-47</sup> detected phosphorylation of Hsp90<sup>S530</sup>  
290 in *C. albicans* hyphal cells<sup>43</sup>. This finding is consistent with our experimental data showing  
291 filamentous growth in the phosphomimetic S530E mutant. While our proteomic analysis  
292 revealed S530 to be phosphorylated in the wild type, the wild-type and *MAL2-HSP90* control  
293 are phenotypically more similar non-phosphorylatable mutant S530A than they are to  
294 phosphomimetic mutant S530E (Fig. 3). This would suggest that phosphorylation of S530 is  
295 sparsely deployed and dynamic. Characterizing the *S. cerevisiae* homologous residue T533  
296 using phosphomimetic and non-phosphorylatable alleles revealed that this residue does not  
297 affect survival at elevated temperatures, susceptibility to Hsp90 inhibition, or yeast growth<sup>48</sup>  
298 suggesting evolutionary divergence in sequence and function. Taken together, the dynamic  
299 phosphorylation status of S530 carefully orchestrating *C. albicans* virulence in a commensal  
300 turned pathogen yeast and the lack of involvement in Hsp90 function of T533 in the benign  
301 yeast *S. cerevisiae* would be in keeping with S530 to be a genetic factor that reduces severity  
302 as predicted by the trade-off hypothesis of optimal virulence theory.

303 In conclusion, Hsp90's phosphorylation status and structural integrity affect fungal  
304 virulence. CK2-mediated phosphorylation of the divergent S530 residue resulting in reduced  
305 fungal virulence could be further exploited as a novel therapeutic target to fight fungal  
306 infections.

307

## 308 References

- 309 1. Bongomin, F., Gago, S., Oladele, R. & Denning, D. Global and multi-national  
310 prevalence of fungal diseases - estimate precision. *JoF* **3**, 57–29 (2017).
- 311 2. Brown, G. D. *et al.* Hidden killers: Human fungal infections. *Sci Transl Med* **4**,  
312 165rv13 (2012).
- 313 3. Benedict, K., Jackson, B. R., Chiller, T. & Beer, K. D. Estimation of direct healthcare  
314 costs of fungal diseases in the United States. *Clin Infect Dis* **30**, 1 (2018).
- 315 4. Whitney, L. *et al.* Effectiveness of an antifungal stewardship programme at a London  
316 teaching hospital 2010–16. *J Antimicrob Chemother* **74**, 234–241 (2018).
- 317 5. Singh, S. D. *et al.* Hsp90 governs echinocandin resistance in the pathogenic yeast  
318 *Candida albicans* via calcineurin. *PLoS Pathog* **5**, e1000532 (2009).
- 319 6. Cordeiro, R. de A. *et al.* Inhibition of heat shock protein 90 enhances the susceptibility  
320 to antifungals and reduces the virulence of *Cryptococcus neoformans/C. gattii* species  
321 complex. *Microbiology* **162**, 309–317 (2015).
- 322 7. Lamoth, F., Juvvadi, P. R., Fortwendel, J. R. & Steinbach, W. J. Heat shock protein 90  
323 is required for conidiation and cell wall integrity in *Aspergillus fumigatus*. *Eukaryot*  
324 *Cell* **11**, 1324–1332 (2012).
- 325 8. Jacob, T. R. *et al.* Heat shock protein 90 (Hsp90) as a molecular target for the

- 326 development of novel drugs against the dermatophyte *Trichophyton rubrum*. *Front*  
327 *Microbiol* **6**, 330–10 (2015).
- 328 9. Rodriguez-Caban, J., Gonzalez-Velazquez, W., Perez-Sanchez, L., Gonzalez-Mendez,  
329 R. & Valle, N. R.-D. Calcium/calmodulin kinase1 and its relation to thermotolerance  
330 and HSP90 in *Sporothrix schenckii*: an RNAi and yeast two-hybrid study. *BMC*  
331 *Microbiol* **11**, 162 (2011).
- 332 10. Robbins, N. *et al.* Hsp90 governs dispersion and drug resistance of fungal biofilms.  
333 *PLoS Pathog* **7**, e1002257 (2011).
- 334 11. Shapiro, R. S. *et al.* Hsp90 orchestrates temperature-dependent *Candida albicans*  
335 morphogenesis via Ras1-PKA signaling. *Curr Biol* **19**, 621–629 (2009).
- 336 12. Guan, G. *et al.* Environment-induced same-sex mating in the yeast *Candida albicans*  
337 through the Hsf1–Hsp90 pathway. *PLoS Biol.* **17**, e2006966–25 (2019).
- 338 13. Senn, H., Shapiro, R. S. & Cowen, L. E. Cdc28 provides a molecular link between  
339 Hsp90, morphogenesis, and cell cycle progression in *Candida albicans*. *Mol Biol Cell*  
340 **23**, 268–283 (2012).
- 341 14. Swoboda, R. K. *et al.* Structure and regulation of the *HSP90* gene from the pathogenic  
342 fungus *Candida albicans*. *Infect Immun* **63**, 4506–4514 (1995).
- 343 15. Cowen, L. E. *et al.* Harnessing Hsp90 function as a powerful, broadly effective  
344 therapeutic strategy for fungal infectious disease. *PNAS* **106**, 2818–2823 (2009).
- 345 16. Mollapour, M. & Neckers, L. Post-translational modifications of Hsp90 and their  
346 contributions to chaperone regulation. *BBA* **1823**, 648–655 (2012).
- 347 17. Li, X., Robbins, N., O'Meara, T. R. & Cowen, L. E. Extensive functional redundancy  
348 in the regulation of *Candida albicans* drug resistance and morphogenesis by lysine  
349 deacetylases Hos2, Hda1, Rpd3 and Rpd31. *Mol Microbiol* **103**, 635–656 (2016).
- 350 18. Lamoth, F. *et al.* Identification of a key lysine residue in heat shock protein 90 required  
351 for azole and echinocandin resistance in *Aspergillus fumigatus*. *Antimicrob Agents*  
352 *Chemother* **58**, 1889–1896 (2014).
- 353 19. Cohen, P. Protein kinases - the major drug targets of the twenty-first century? *Nat Rev*  
354 *Drug Discov* **1**, 309–315 (2002).
- 355 20. Sima, S. & Richter, K. Regulation of the Hsp90 system. *BBA-Mol Cell Res* **1865**, 889–  
356 897 (2018).
- 357 21. Borkovich, K. A., Farrelly, F. W., Finkelstein, D. B., Taulien, J. & Lindquist, S. hsp82  
358 is an essential protein that is required in higher concentrations for growth of cells at  
359 higher temperatures. *Mol Cell Biol* **9**, 3919–3930 (1989).
- 360 22. Lees-Miller, S. Two human 90-kDa heat shock proteins are phosphorylated *in vivo* at  
361 conserved serines that are phosphorylated *in vitro* by casein kinase II. *J Biol Chem*  
362 (1989).
- 363 23. Diezmann, S., Michaut, M., Shapiro, R. S., Bader, G. D. & Cowen, L. E. Mapping the  
364 Hsp90 genetic interaction network in *Candida albicans* reveals environmental  
365 contingency and rewired circuitry. *PLoS Genet* **8**, e1002562 (2012).
- 366 24. Bruno, V. M. Regulation of azole drug susceptibility by *Candida albicans* protein  
367 kinase CK2. *Mol Microbiol* **56**, 559–573 (2005).
- 368 25. Cowen, L. E. & Lindquist, S. Hsp90 potentiates the rapid evolution of new traits: drug  
369 resistance in diverse fungi. *Science* **309**, 2185–2189 (2005).
- 370 26. Ewald, P. W. 1983. Host-parasite relations, vectors, and the evolution of disease  
371 severity. *Ann Rev Ecol Syst* **14**, 465–485 (1983).
- 372 27. Pearl, L. H. & Prodromou, C. Structure and mechanism of the Hsp90 molecular  
373 chaperone machinery. *Annu Rev Biochem* **75**, 271–294 (2006).
- 374 28. Ali, M. M. U. *et al.* Crystal structure of an Hsp90–nucleotide–p23/Sba1 closed  
375 chaperone complex. *Nature* **440**, 1013–1017 (2006).

- 376 29. Bustamante, C. D., Townsend, J. P. & Hartl, D. L. Solvent accessibility and purifying  
377 selection within proteins of *Escherichia coli* and *Salmonella enterica*. *Mol Biol Evol*  
378 **17**, 301–308 (2000).
- 379 30. Blackwell, M. The Fungi: 1, 2, 3 ... 5.1 million species? *Am J Bot* **98**, 426–438 (2011).
- 380 31. Burt, E. T. *et al.* Isolation and partial characterization of Hsp90 from *Candida*  
381 *albicans*. *Ann Clin Lab Sci* **33**, 86–93 (2003).
- 382 32. Mollapour, M. *et al.* Threonine 22 phosphorylation attenuates Hsp90 interaction with  
383 cochaperones and affects its chaperone activity. *Mol Cell* **41**, 672–681 (2011).
- 384 33. Röhl, A., Rohrberg, J. & Buchner, J. The chaperone Hsp90: changing partners for  
385 demanding clients. *Trends Biochem Sci* **38**, 253–262 (2013).
- 386 34. Nathan, D. F. & Lindquist, S. Mutational analysis of Hsp90 function: interactions with  
387 a steroid receptor and a protein kinase. *Mol Cell Biol* **15**, 3917–3925 (1995).
- 388 35. Saville, S. P., Lazzell, A. L., Monteagudo, C. & Lopez-Ribot, J. L. Engineered control  
389 of cell morphology *in vivo* reveals distinct roles for yeast and filamentous forms of  
390 *Candida albicans* during infection. *Eukaryot Cell* **2**, 1053–1060 (2003).
- 391 36. Lagree, K. & Mitchell, A. P. Fungal biofilms: Inside out. *Microbiol Spectr* **5**, 1–22  
392 (2017).
- 393 37. Azadmanesh, J., Gowen, A. M., Creger, P. E., Schafer, N. D. & Blankenship, J. R.  
394 Filamentation involves two overlapping, but distinct, programs of filamentation in the  
395 pathogenic fungus *Candida albicans*. *G3 (Bethesda)* **7**, 3797–3808 (2017).
- 396 38. Lyons, N. *et al.* Tobacco Hornworm (*Manduca sexta*) caterpillars as a novel host  
397 model for the study of fungal virulence and drug efficacy. *Virulence* **11**, 1075–1089  
398 (2020).
- 399 39. Mollapour, M., Tsutsumi, S., Kim, Y. S., Trepel, J. & Neckers, L. Casein kinase 2  
400 phosphorylation of Hsp90 threonine 22 modulates chaperone function and drug  
401 sensitivity. *Oncotarget* **2**, 407–417 (2011).
- 402 40. Rehn, A. *et al.* A methylated lysine is a switch point for conformational  
403 communication in the chaperone Hsp90. *Nat Commun* **11**, 1–14 (2020).
- 404 41. Nussinov, R., Tsai, C.-J., Xin, F. & Radivojac, P. Allosteric post-translational  
405 modification codes. *Trends Biochem Sci* **37**, 447–455 (2012).
- 406 42. Robbins, N., Leach, M. D. & Cowen, L. E. Lysine deacetylases Hda1 and Rpd3  
407 regulate Hsp90 function thereby governing fungal drug resistance. *Cell Reports* **2**, 878–  
408 888 (2012).
- 409 43. Willger, S. D. *et al.* Analysis of the *Candida albicans* phosphoproteome. *Eukaryot Cell*  
410 **14**, 474–485 (2015).
- 411 44. Ghorai, P., Irfan, M., Narula, A. & Datta, A. A comprehensive analysis of *Candida*  
412 *albicans* phosphoproteome reveals dynamic changes in phosphoprotein abundance  
413 during hyphal morphogenesis. *Appl Microbiol Biotechnol* **102**, 1–13 (2018).
- 414 45. Bar-Yosef, H. *et al.* A global analysis of kinase function in *Candida albicans* hyphal  
415 morphogenesis reveals a role for the endocytosis regulator Akl1. *Front Cell Infect*  
416 *Microbiol* **8**, 1538–13 (2018).
- 417 46. Vlastaridis, P. *et al.* The pivotal role of protein phosphorylation in the control of yeast  
418 central metabolism. *G3 (Bethesda)* **7**, 1239–1249 (2017).
- 419 47. Cao, C. *et al.* Global regulatory roles of the cAMP/PKA pathway revealed by  
420 phenotypic, transcriptomic and phosphoproteomic analyses in a null mutant of the  
421 PKA catalytic subunit in *Candida albicans*. *Mol Microbiol* **105**, 46–64 (2017).
- 422 48. Soroka, J. *et al.* Conformational switching of the molecular chaperone Hsp90 via  
423 regulated phosphorylation. *Mol Cell* **45**, 517–528 (2012).
- 424 49. Pereira, F. *et al.* Effect of Sec61 interaction with Mpd1 on endoplasmic reticulum-  
425 associated degradation. *PLoS ONE* **14**, e0211180–19 (2019).

- 426 50. Mezulis, S., Yates, C. M., Wass, M. N., Sternberg, M. J. E. & Kelley, L. A. The Phyre2  
427 web portal for protein modeling, prediction and analysis. *Nat Protoc* 1–14 (2019).  
428 51. Schrödinger, L. L. C. The PyMOL Molecular Graphics System.  
429 52. Larsson, A. AliView: a fast and lightweight alignment viewer and editor for large  
430 datasets. *Bioinformatics* **30**, 3276–3278 (2014).  
431 53. Edgar, R. C. MUSCLE: multiple sequence alignment with high accuracy and high  
432 throughput. *Nucleic Acid Res* **32**, 1792–1797 (2004).  
433 54. Kumar, S., Stecher, G., Li, M., Knyaz, C. & Tamura, K. MEGA X: Molecular  
434 Evolutionary Genetics Analysis across computing platforms. *Mol Biol Evol* **35**, 1547–  
435 1549 (2018).  
436 55. Maddison, W. P. & Maddison, D. R. Mesquite: a modular system for evolutionary  
437 analysis.  
438 56. Mersondavies, L. A. & Odds, F. C. A morphology index for characterization of cell-  
439 shape in *Candida albicans*. *J Gen Microbiol* **135**, 3143–3152 (1989).  
440 57. Schneider, C. A., Rasband, W. S. & Eliceiri, K. W. NIH Image to ImageJ: 25 years of  
441 image analysis. *Nat Methods* **9**, 671 EP –  
442 58. Saldanha, A. J. Java Treeview - extensible visualization of microarray data.  
443 *Bioinformatics* **20**, 3246–3248 (2004).  
444 59. Sherry, L. *et al.* Biofilms formed by *Candida albicans* bloodstream isolates display  
445 phenotypic and transcriptional heterogeneity that are associated with resistance and  
446 pathogenicity. *BMC Microbiol* **14**, 182 (2014).  
447 60. Erlandsen, S. L., Kristich, C. J., Dunny, G. M. & Wells, C. L. High-resolution  
448 visualization of the microbial glycoalyx with low-voltage scanning electron  
449 microscopy: Dependence on cationic dyes. *J Histochem Cytochem.* **52**, 1427–1435  
450 (2016).  
451  
452

## 453 **Methods**

454 **Strains, strain construction and culture conditions.** All strains used in this study are listed  
455 in Table S1. A detailed description of strain and plasmid construction can be found in the  
456 Supplementary Information together with Tables S2 and S3, which list the necessary primers.  
457 In preparation for experiments, strains were grown for 16-18 hours in YPM (1% yeast extract,  
458 2% peptone, 2% maltose) at 30°C while shaking at 200 rpm, unless specified otherwise. To  
459 repress the *HSP90* wild-type allele, strains were grown in YPD (1% yeast extract, 2%  
460 peptone, 2% dextrose) at the temperatures specified. For long-term storage, strains were  
461 maintained at -80°C in 25% glycerol.

462 **Identification of the S530 phosphorylation site.** The S530 phosphorylation site in Hsp90  
463 was identified by mass spectrometric analysis of purified Hsp90 in the Proteomics Core  
464 Facility at EMBL Heidelberg, Germany. To purify Hsp90 from CK2 deletion mutants  
465 (YSD692, YSD675, YSD694, YSD696) and the corresponding wild type (YSD673), strains  
466 were grown to mid-log phase at 30°C in 200 ml volumes in YPD at 30°C. Whole cell proteins  
467 were extracted as described below and the C-terminally TAP-tagged chaperone was pulled  
468 down using IgG agarose beads from lysate containing 20 mg of protein (see below). The  
469 protein was eluted in 100 µl 1x sample buffer and heated to 95°C for 10 minutes prior to  
470 loading 30 µl onto a 10% Tris-glycine SDS-PAGE gel for separation. Coomassie-stained gels  
471 were imaged and the bands corresponding to Hsp90 were cut out and processed by in-gel  
472 digestion<sup>49</sup>. Hsp90's phosphorylation sites were identified using Glu-C and trypsin digestion  
473 and liquid chromatography-mass spectrometry on a QExactive plus mass spectrometer  
474 (Thermo Fisher).

475 **Structural modelling.** A model of the full-length *C. albicans* Hsp90 monomer was generated  
476 based on the *S. cerevisiae* Hsp90-Sba1 crystal structure<sup>28</sup> (PDB #2cg9) using the Phyre<sup>2</sup>  
477 engine<sup>50</sup>. The model was aligned to the *S. cerevisiae* sequence and visualized using the  
478 PyMOL Molecular Graphics System<sup>51</sup>.

479 **Ancestral character state reconstruction.** Sequences of 240 fungal taxa were obtained from  
480 the Ensembl Genomes database for fungi and aligned with the murine homolog Hsp90ab1  
481 (Table S4) in AliView version 1.26<sup>52</sup> using the integrated default alignment program  
482 MUSCLE<sup>53</sup>. A Neighbor Joining tree was built in MEGA version 10.1.8<sup>54</sup> and loaded into  
483 Mesquite version 3.61<sup>55</sup> for ancestral character state reconstruction using the parsimony  
484 criterion.

485 **Western blotting and co-immunoprecipitations.**

486 To determine Hsp90 stability in the wild-type, *MAL2-HSP90* control and hsp90 mutant  
487 strains, stationary phase cells grown in YPM were inoculated into YPD or YPM at an OD<sub>600</sub>  
488 of 0.2 and incubated until they reached a log-phase OD<sub>600</sub> between 1.3 to 1.9 (approximately  
489 4.5 hours). 50 ml of cell culture were pelleted, snap frozen in liquid nitrogen, and stored  
490 overnight at -20°C. Pellets were thawed on ice, washed twice with 1x PBS and resuspended in  
491 250 µl lysis buffer (50 mM HEPES pH 7.5, 150 mM NaCl, 5 mM EDTA, 1% Triton X100, 1  
492 cOmplete EDTA-free protease inhibitor tablet, 1 mM PMSF). Cells were transferred to  
493 Precellys 2 ml Tough Micro-organism Lysing Kit tubes (VK05) and lysed using a Precellys  
494 Evolution tissue homogenizer. Samples were processed in 3 cycles, each consisting of bead  
495 beating at 6,000 rpm for 1 minute, pause for 30 seconds, bead beating at 6,000 rpm for 1  
496 minute. Tubes were rested on ice for at least 1 minute between each cycle. Lysates were  
497 cleared twice by centrifugation at 20,000 xg at 4°C for 30 minutes, and 5 minutes.  
498 Supernatants were transferred to microfuge tubes and refrigerated in preparation for sample  
499 preparation and gel loading. The lysates' whole cell protein concentrations were determined  
500 with a Quick Start Bradford Protein Assay (Bio-Rad) and calibrated against a BSA standard  
501 curve. Samples were diluted to 0.1 µg/µl protein in sample buffer (70 mM Tris-HCl pH 6.8,  
502 11.1% glycerol, 1.1% SDS, 0.005% bromophenol blue, 10% 2-mercaptoethanol, all final  
503 concentrations), heated at 95°C for 10 minutes and either cooled on ice prior to loading or  
504 stored at -20°C.

505 As loading controls, 100 µl per sample were loaded onto a 10% SDS-PAGE gel and  
506 separated for 20 minutes at 90 volts, followed by 100 minutes at 120 volts. To visualize  
507 proteins, gels were stained with SimplyBlue SafeStain (Invitrogen) according to the  
508 manufacturer's instructions and imaged by scanning.

509 For immunoblotting of *C. albicans* Hsp90, 15 µl were loaded on a 10% SDS-PAGE gel  
510 and separated for 20 minutes at 90 volts, followed by 100 minutes at 120 volts. Proteins were  
511 wet-transferred onto a PVDF membrane (Bio-Rad) for 135 minutes at 300 mA in a Mini-  
512 PROTEAN Tetra Vertical Electrophoresis Cell filled with transfer-buffer (2 M glycine, 0.25  
513 M Tris-base, 20% methanol). To block free sites, membranes were treated with PBST (1x  
514 PBS, 0.1% Tween 20) with 0.1% non-fat milk overnight at 4°C. The blots were probed for 1  
515 hour at room temperature with α-CaHsp90<sup>31</sup> diluted 1:10,000 in PBST with 0.1% milk and  
516 washed with 1x PBST prior to probing with α-rabbit antibody-HRP conjugate (BioRad  
517 #1705046) for 15 minutes at room temperature. Lastly, blots were washed with 200 ml PBST

518 using the SNAP i.d. 2.0 Protein Detection System (Merck Millipore), incubated with Clarity  
519 Western ECL (BioRad), and imaged on the Syngene G:Box transilluminator.

520 To purify Hsp90 for mass-spectrometric analysis and to investigate the effect of Hsp90  
521 phospho-mutant alleles on co-chaperone binding, 200 ml of cells were grown as described  
522 above, washed twice in 1x PBS and resuspended in 2 ml co-IP lysis buffer (50 mM Tris-HCl  
523 pH 7.5, 1% Nonidet P 40 Substitute (Sigma #74385), 0.25% deoxycholate Na, 150 mM NaCl,  
524 5 mM EDTA, 1 mM Na<sub>2</sub>MoO<sub>4</sub>•2H<sub>2</sub>O, PhosSTOP tablet, cOmplete EDTA-free protease  
525 inhibitor tablet, 1 mM PMSF, 1 mM Na<sub>3</sub>VO<sub>4</sub>, and 10 mM NaF). Cells were transferred to 15  
526 ml Precellys sample tubes (VWR BERT KT03961-1-4061), mixed with 1 ml acid-washed  
527 glass beads (~400 μm) and mechanically disrupted using a Precellys Tissue Homogeniser.  
528 Tubes were agitated three times for one minute with one minute on ice in between. The lysate  
529 was cleared by centrifugation at 20,000 *xg* twice for 5 minutes at 4°C and protein  
530 concentrations determined using the Bradford assay described above. 7.5 mg of protein were  
531 mixed with 100 μl of IgG or α-HA agarose, depending on the strain's genotype, in co-IP  
532 washing buffer (50 mM Tris-HCl pH 7.5, 1% Nonidet P 40 substitute, 0.25% deoxycholate  
533 Na, 150 mM NaCl, 5 mM EDTA, 1 mM Na<sub>2</sub>MoO<sub>4</sub>•2H<sub>2</sub>O, 1 mM PMSF, 1 mM Na<sub>3</sub>VO<sub>4</sub>, and  
534 10 mM NaF) and gently rotated for 2 hours at 4°C. Following precipitation, the agarose beads  
535 were washed carefully 3-5 times with 1 ml co-IP washing buffer before being mixed with 100  
536 μl 1x sample buffer (6x sample buffer: 0.35 M Tris HCl, 10% (w/w) SDS, 36% glycerol, 5%  
537 2-mercaptoethanol and 0.012% bromophenol blue). Prior to loading, samples were heated at  
538 95°C for 10 minutes and cooled on ice ready for loading or stored at -80°C. Proteins were  
539 separated at 120 volts on size-appropriate SDS-PAGE gels.

540 To visualize epitope-tagged co-chaperones, proteins were wet-transferred onto PVDF  
541 membranes for 16 hours at 20 volts in a Mini-PROTEAN Tetra Vertical Electrophoresis Cell  
542 filled with transfer-buffer (2 M glycine, 0.25 M Tris-base, 20% methanol). Membranes were  
543 blocked with PBST and 5% milk for at least 1 hour at room temperature before being probed  
544 with primary and secondary antibodies. To visualize TAP-tagged Stl1, membranes were  
545 treated with α-TAP antibody (Open Biosystems #CAB1001). Membranes carrying HA-  
546 tagged Cdc37, Aha1 or Sba1 were exposed to α-HA antibody (Invitrogen #71-5500). Both  
547 primary antibodies were diluted 1:5,000 in PBST with 0.2% milk and subsequently  
548 conjugated with α-rabbit antibody-HRP conjugate (BioRad Immun-Star Goat Anti-Rabbit  
549 (GAR)-HRP Conjugate #1705046) diluted 1:5,000. Membranes were incubated in antibody  
550 solutions for 15 minutes each and washed at least three times using 1x PBST using the SNAP



551 i.d. 2.0 Protein Detection System. Lastly, proteins were visualized with Clarity Western ECL  
552 (BioRad).

553 **Temperature growth profiles.** To assess susceptibility to thermal stress, optical densities of  
554 stationary phase cultures were measured at 600 nm and adjusted to 0.1 in 1x PBS and serially  
555 diluted two-fold. 4  $\mu$ l of cell suspension were then spotted onto solid YPD or YPM and plates  
556 were incubated at the indicated temperature for 48 hours. Plates were photographed and  
557 analyzed visually.

558 **Cellular morphogenesis analysis.** Stationary phase cells grown in YPM at 30°C were diluted  
559 to an optical density of 0.2 in YPD or YPM and grown for 16 hours at 30°C while shaking at  
560 200 rpm. In preparation for microscopy, cells were washed and diluted with 1x PBS to a cell  
561 density appropriate for microscopy. Images were collected using the DIC settings on a Nikon  
562 Eclipse E8000 microscope with a Nikon Digital Sight DS-5M camera. To calculate the  
563 morphology index (MI)<sup>56</sup>, a total of 100 cells per strain were randomly selected and their  
564 width at the septal junction as well as cell length and maximum diameter measured using  
565 ImageJ<sup>57</sup>. The MI for each cell was then presented in scatter plots.

566 **Drug susceptibility assays.** Strains were grown to stationary phase at 30°C in YPM while  
567 shaking at 200 rpm and their optical densities were measured at 600 nm and adjusted to  $\sim 10^3$   
568 cells/100  $\mu$ l. Fluconazole was diluted in water to a starting concentration of 512  $\mu$ g/ml and 20  
569  $\mu$ l of drug were mixed with 180  $\mu$ l YPD or YPM in a 96-well flat bottom dish. The drug was  
570 then diluted two-fold in YPD or YPM to cover a gradient ranging from 256  $\mu$ g/ml to 4  $\mu$ g/ml.  
571 100  $\mu$ l of cell suspension were added to each well and plates were incubated for 48 hours at  
572 25°C and optical densities recorded at 595 nm. A 5 mM radicicol stock solution (DMSO) was  
573 diluted to 50  $\mu$ g/ml in YPM or YPD. The drug was diluted in either media to the following  
574 concentrations: 1, 2, 3, 4, 5, 7.5, 10, 15, 20, and 25  $\mu$ g/ml and strains inoculated as above. To  
575 account for the effects of DMSO alone, strains were also inoculated in 0.0275% DMSO.  
576 Plates were incubated for 48 hours at 25°C in the dark and optical densities recorded at 595  
577 nm. Optical density values were normalized to the no treatment column and visualized using  
578 Java TreeView version 1.1.6r4<sup>58</sup>.

579 **Colony morphology screen.** Wild-type, control and mutant strains were grown overnight in  
580 YPM at 30°C while shaking at 200 rpm. Stationary cultures were then diluted to an optical  
581 density of 0.02 at 600 nm and 5  $\mu$ l of cell suspension spotted onto RPMI, Spider, and  
582 synthetic defined media with and without Calcofluor White or Congo Red (Table S5). After

583 incubation at 30°C for 48 hours colonies were visually scored for appearance as ‘smooth’,  
584 ‘rough’, ‘wrinkly’, or ‘wrinkly with hyphal edge’ and photographed.

585 **Biofilm analyses.** In preparation for biofilm analyses, *C. albicans* strains were cultured  
586 overnight in YPD at 30°C while shaking at 150 rpm. Stationary phase cells were centrifuged  
587 at 4,400 rpm for 5 minutes, washed with 1x PBS and counted using a Neubauer  
588 hemocytometer. To induce biofilm formation, cells were diluted to 10<sup>6</sup> cells/ml in RPMI  
589 (Sigma-Aldrich/Merck # R7755) and incubated at 37°C for 24 hours in flat-bottom 96-well  
590 dishes for cell viability and biomass assays or on Thermanox™ coverslips for scanning  
591 electron microscopy. Cell viability was assessed by metabolic reduction of resazurin sodium  
592 salt (Sigma-Aldrich/Merck #R7017). For the assay, 0.1 g of resazurin was dissolved in 10 ml  
593 1x PBS and filter-sterilized. Biofilm wells were washed twice with 1x PBS and filled with  
594 100 µl of a 1:1000 dilution of resazurin in RPMI. Plates were incubated at 37°C for 25  
595 minutes and absorbance measured at 570 nm. Upon completion of the resazurin cell viability  
596 assay, plates were left to dry overnight and biofilm biomass assessed by staining with 0.05%  
597 w/v crystal violet. Upon washing and de-staining with 100% ethanol, biomass was quantified  
598 by spectrophotometric measurements at 570 nm in a FluoStar Omega (BMG Labtech)  
599 microtitre plate reader<sup>59</sup>. To visualize biofilms grown on coverslips, they were washed once  
600 with 1x PBS and fixed overnight at 4°C in 500 µl of 0.15% w/v Alcian Blue dissolved in 2%  
601 para-formaldehyde, 2% glutaraldehyde, and 0.15 M sodium cacodylate. Samples were imaged  
602 as described previously<sup>60</sup>.

603 **Virulence assays.** To assess if Hsp90 phosphorylation affects virulence, we infected  
604 caterpillars of the Tobacco Hornworm *Manduca sexta*<sup>38</sup>, a novel invertebrate model of fungal  
605 disease. In preparation for virulence assays, *C. albicans* strains were grown overnight in YPD  
606 at 30°C and stationary phase cultures were washed twice with 1x PBS. Cell density was  
607 adjusted to 10<sup>8</sup> cells/ml for each strain and groups of ten caterpillars were injected with 100 µl  
608 cell suspension per animal or 1x PBS in their left rear proleg. Caterpillars were maintained at  
609 37°C and scored for survival after 16 hours.

610 **Statistical analyses.** All analyses were carried out in R Version 3.6.0 and plotted using  
611 ggplot2. To assess the effect of the Hsp90 mutant alleles on cellular morphology, the MIs for  
612 samples grown in YPD and YPM were compared with each other using the Mann-Whitney U  
613 test. Statistical differences between biofilm cell viability and biomass production were  
614 assessed using a linear model of strain versus optical density comparing the mutant strains to

615 the maltose control. Statistical significance of caterpillar survival was assessed using Fisher's  
616 exact test.  
617

618 **Acknowledgments**

619 We would like to thank Prof Alistair J. P. Brown for comments on the manuscript, Ewan  
620 Basterfield and Chris Aparak for technical support with the *Manduca* caterpillars, and Profs  
621 Julia R. Köhler, Jürgen Wendland, and Malcolm Whiteway for their generous plasmid gifts.  
622 This work was funded by MRC grant MR/L018349/1 to SD. JLC was supported by the MRC  
623 GW4 ‘Biomed’ Doctoral Training Program.

624

625 **Author contributions**

626 LA, JLC and SD conceived and designed this study. LA constructed strains, prepared samples  
627 for mass spectrometry, conducted Hsp90 stability assays and assessed co-chaperone  
628 associations. JLC conducted Hsp90 stability and drug susceptibility assays. UO performed the  
629 structural modelling analysis. RW performed Hsp90 phylogenetic analyses and ancestral  
630 character state reconstruction. CEW performed *in vivo* assays. HOB analyzed growth,  
631 morphology, and biofilm data. CS assisted with mass spectrometric analyses. MB & GR  
632 performed and analyzed biofilm formation. SD drafted and edited the manuscript.

633

634 **Competing interest declaration**

635 The authors declare no competing interests.

636

637 **Additional information**

638 Supplementary information is available for this paper.

639 Correspondence and requests for materials should be addressed to SD.

640 Code availability: All custom code is available from:

641 [https://github.com/hobrien/DiezmansLab/blob/master/T25\\_analysis.Rmd](https://github.com/hobrien/DiezmansLab/blob/master/T25_analysis.Rmd)

642 Corresponding author: Stephanie Diezmann [s.diezmann@bristol.ac.uk](mailto:s.diezmann@bristol.ac.uk)

643

644 **Figures**

Alaalm et al.

**Figure 1**

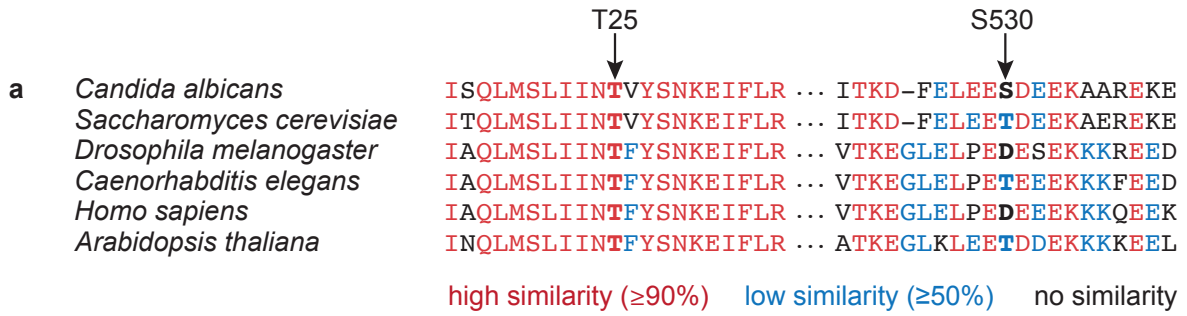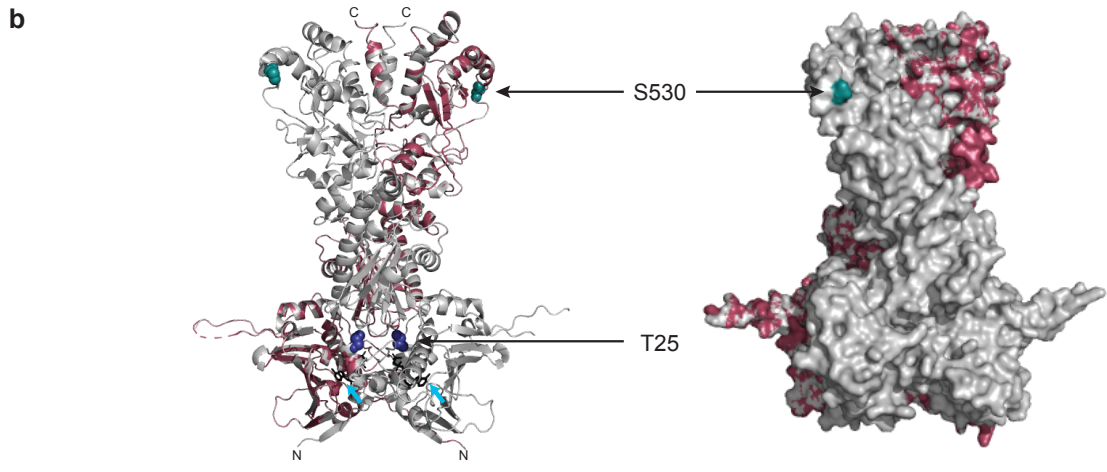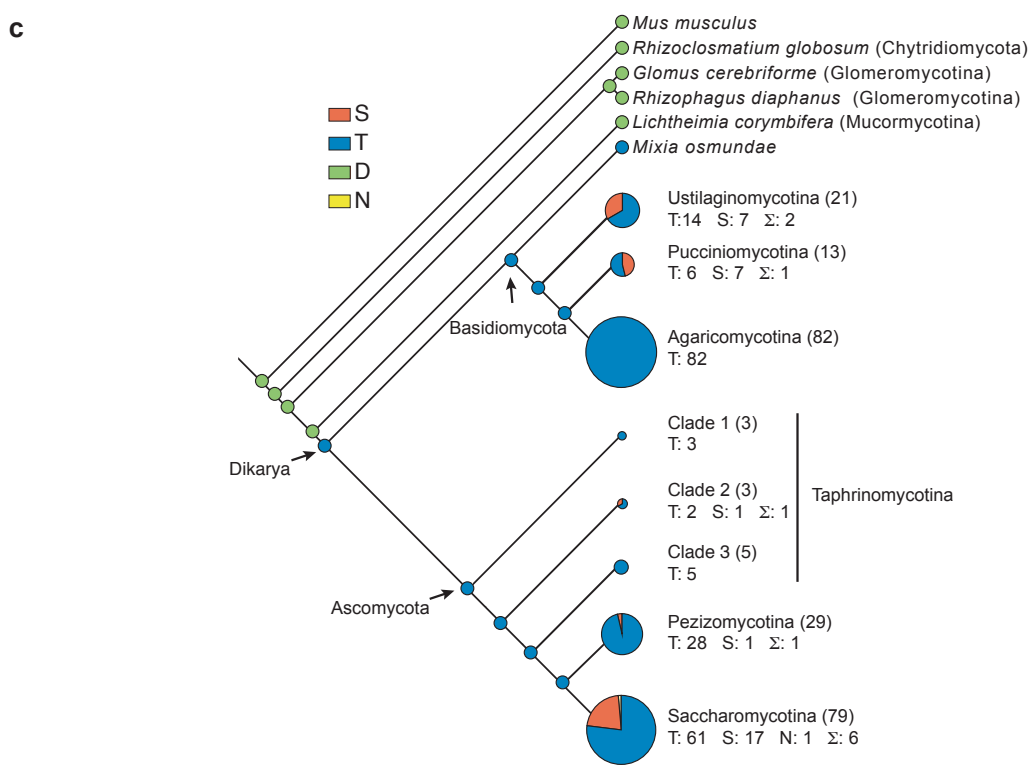

645

646 **Figure 1: Structural modeling and ancestral character state reconstruction of CK2**  
647 **phosphorylation sites in Hsp90.** a) Alignment of eukaryotic Hsp90 protein sequences,  
648 comparing two fungal sequences to three animal and one plant protein. T25 resides in a  
649 highly conserved (red) region of the N-terminal domain of Hsp90. S530 is located in a  
650 divergent (blue) region of the Hsp90 middle domain. b) *C. albicans* Hsp90 (purple) modeled  
651 on the full-length crystal structure of *S. cerevisiae* Hsp90 (grey). T25 (blue) and S530 (teal)  
652 are visualized on the homology model (left) and the surface model (right). Azure arrows point  
653 to bound ATP in the homology model. c) Ancestral character state reconstruction of  
654 Hsp90<sup>S530</sup> in 240 fungal taxa reveals at least eleven independent transitions from threonine  
655 (blue) to serine (red) within the Dikarya. Basal fungi share the ancestral aspartic acid residue  
656 (green) with the animal root (*Mus musculus*) of the tree. Within the Ascomycota and the  
657 Basidiomycota, subphyla have been collapsed and the circle size indicates the number of taxa  
658 within each clade. The number of taxa per subphylum is given in brackets, and the number of  
659 taxa with either threonine or serine or asparagine (yellow) are indicated with T, S, or N. The  
660 number of independent transitions within each subphylum is indicated by  $\Sigma$ . For character  
661 state reconstruction within ascomycetous and basidiomycetous subphyla see Fig. S1.  
662

Alaalm et al.

Figure 2

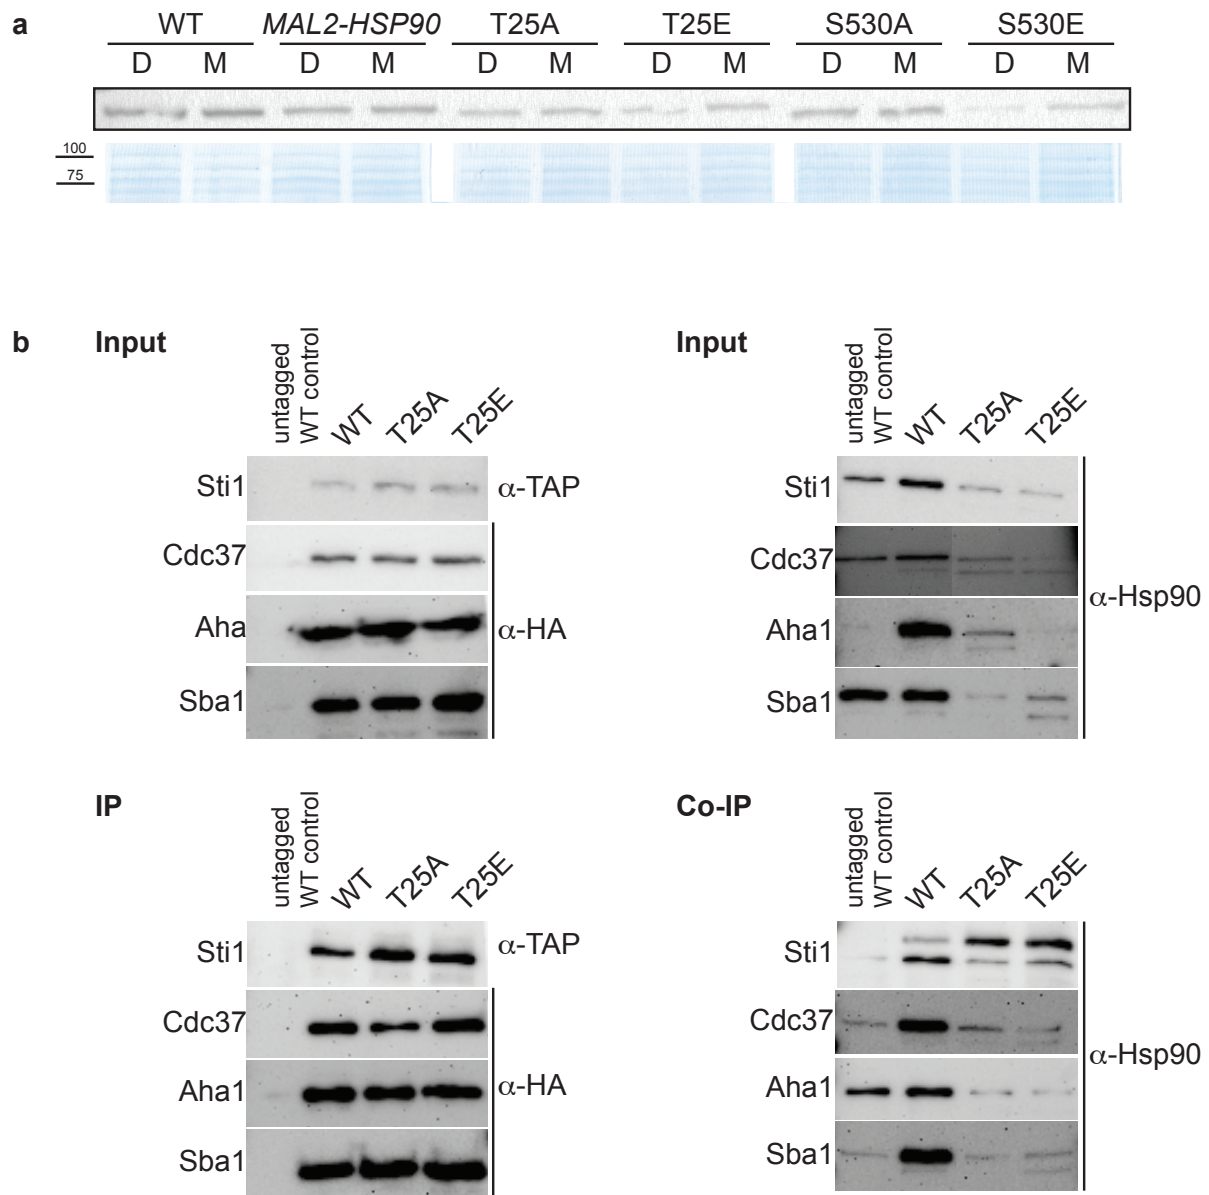

663

664 **Figure 2: The *C. albicans* Hsp90 co-chaperone machinery is regulated by**  
665 **phosphorylation.** a) One of two Western blots probed for presence of Hsp90 in *C. albicans*  
666 wild-type (WT), promoter control (*MAL2-HSP90*) and T25 and S530 mutant strains (top).  
667 Strains were grown in media containing either maltose (M) or dextrose (D) to regulate  
668 expression of mutant *HSP90* via the maltose-inducible promoter. A Coomassie-stained SDS  
669 gel validates equal loading of protein samples (bottom). b) TAP-tagged Sti1 and HA-tagged  
670 co-chaperones Cdc37, Aha1, and Sba1 were co-immunoprecipitated with Hsp90 in the wild  
671 type (WT) and the T25 mutants. The input was first probed for presence of co-chaperones and  
672 Hsp90 prior to immuno-precipitation with IgG or  $\alpha$ -HA agarose targeting the co-chaperones.

673 Levels of co-chaperones were then assessed in the immuno-precipitate (IP) using  $\alpha$ -TAP and  
674  $\alpha$ -HA antibodies. To screen for co-immunoprecipitated Hsp90 (Co-IP), the membrane was  
675 probed with an Hsp90-specific antibody.  
676



Alaalm et al.

Figure 3

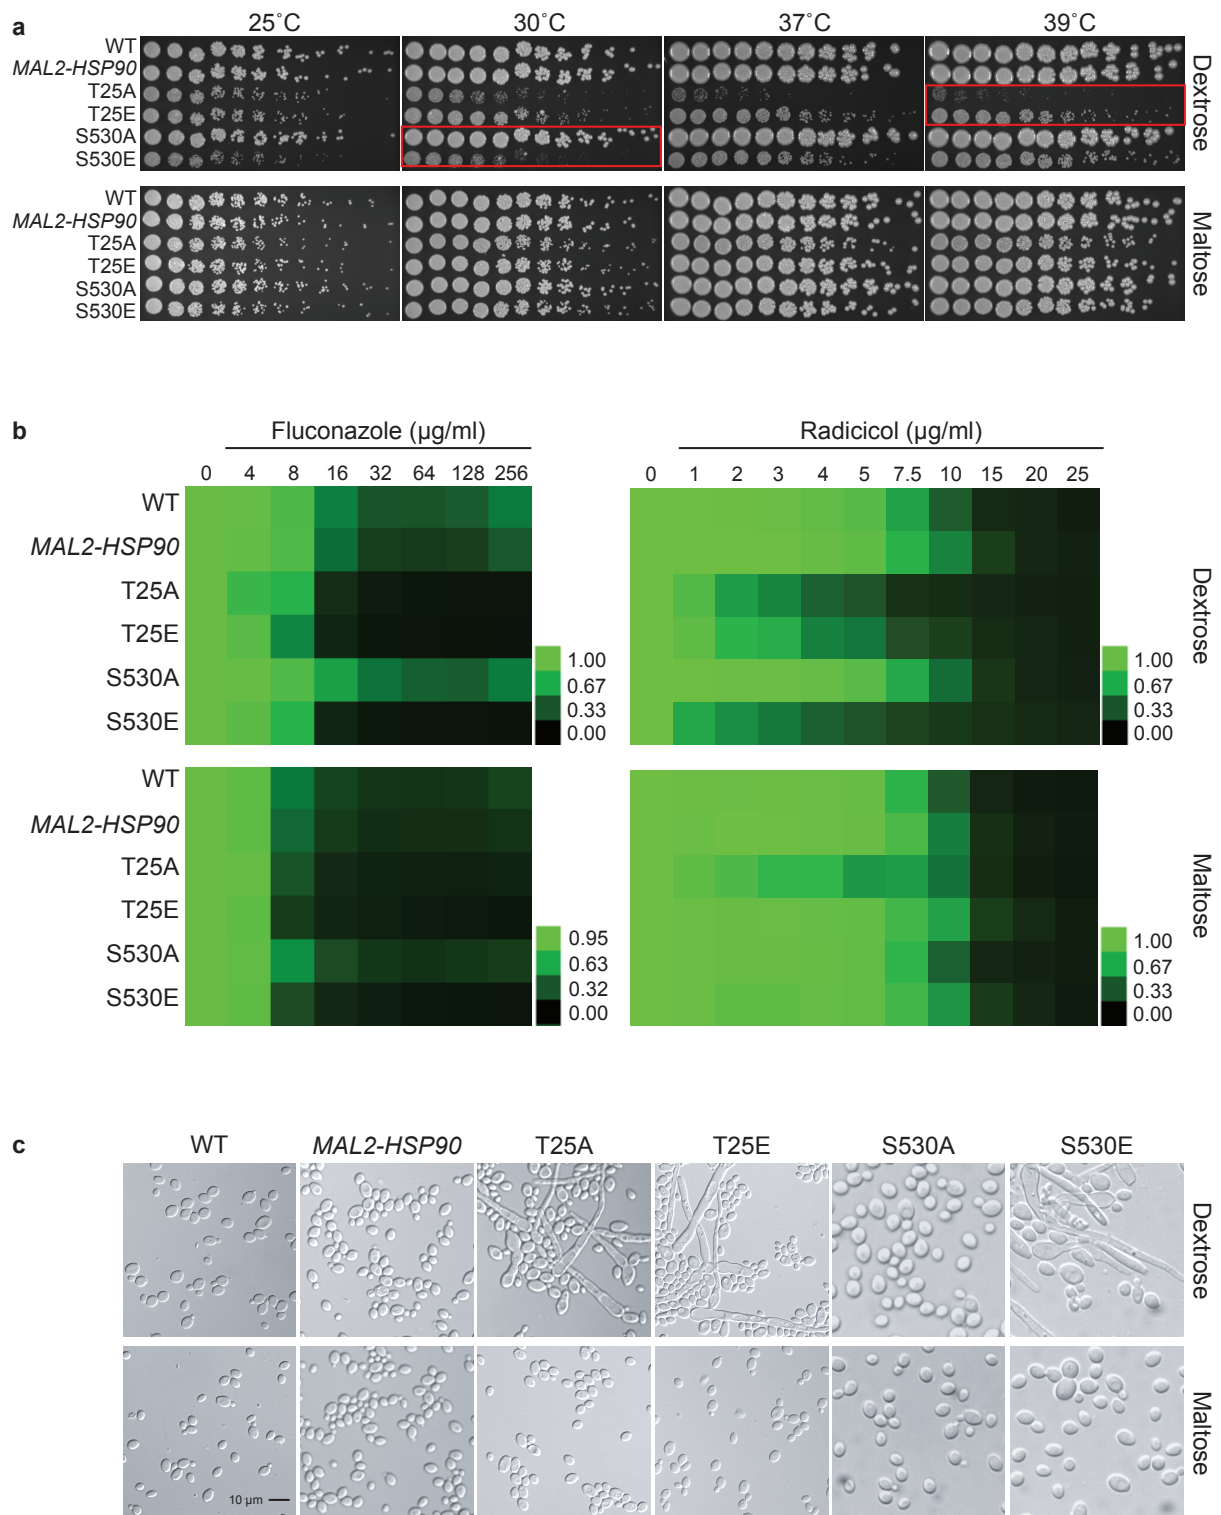

677

678 **Figure 3: Expression of key virulence traits is contingent on Hsp90's phosphorylation**

679 **status.** a) Two-fold serial dilutions of the *HSP90* wild-type, the *MAL2-HSP90* promoter

680 control strain, and *hsp90* phospho-mutants were spotted onto solid media containing either

681 dextrose or maltose and incubated at the indicated temperatures for 48 hours. Red boxes

682 highlighting severe phenotypes. b) Wild-type and mutant cells were exposed to increasing  
683 doses of the commonly employed antifungal drug fluconazole and the Hsp90 inhibitor  
684 radicicol in media containing either dextrose (top) or maltose (bottom). Following incubation  
685 at 25°C, cell growth was assessed, normalized to the media only control and expressed as heat  
686 map where green indicates full growth and black represents no growth. c) DIC microscopic  
687 images of representative cells from each strain confirming morphogenetic changes of cells  
688 grown in dextrose (top) but not maltose (bottom). Shown are one of two biological replicates.  
689

Alaalm et al.

Figure 4

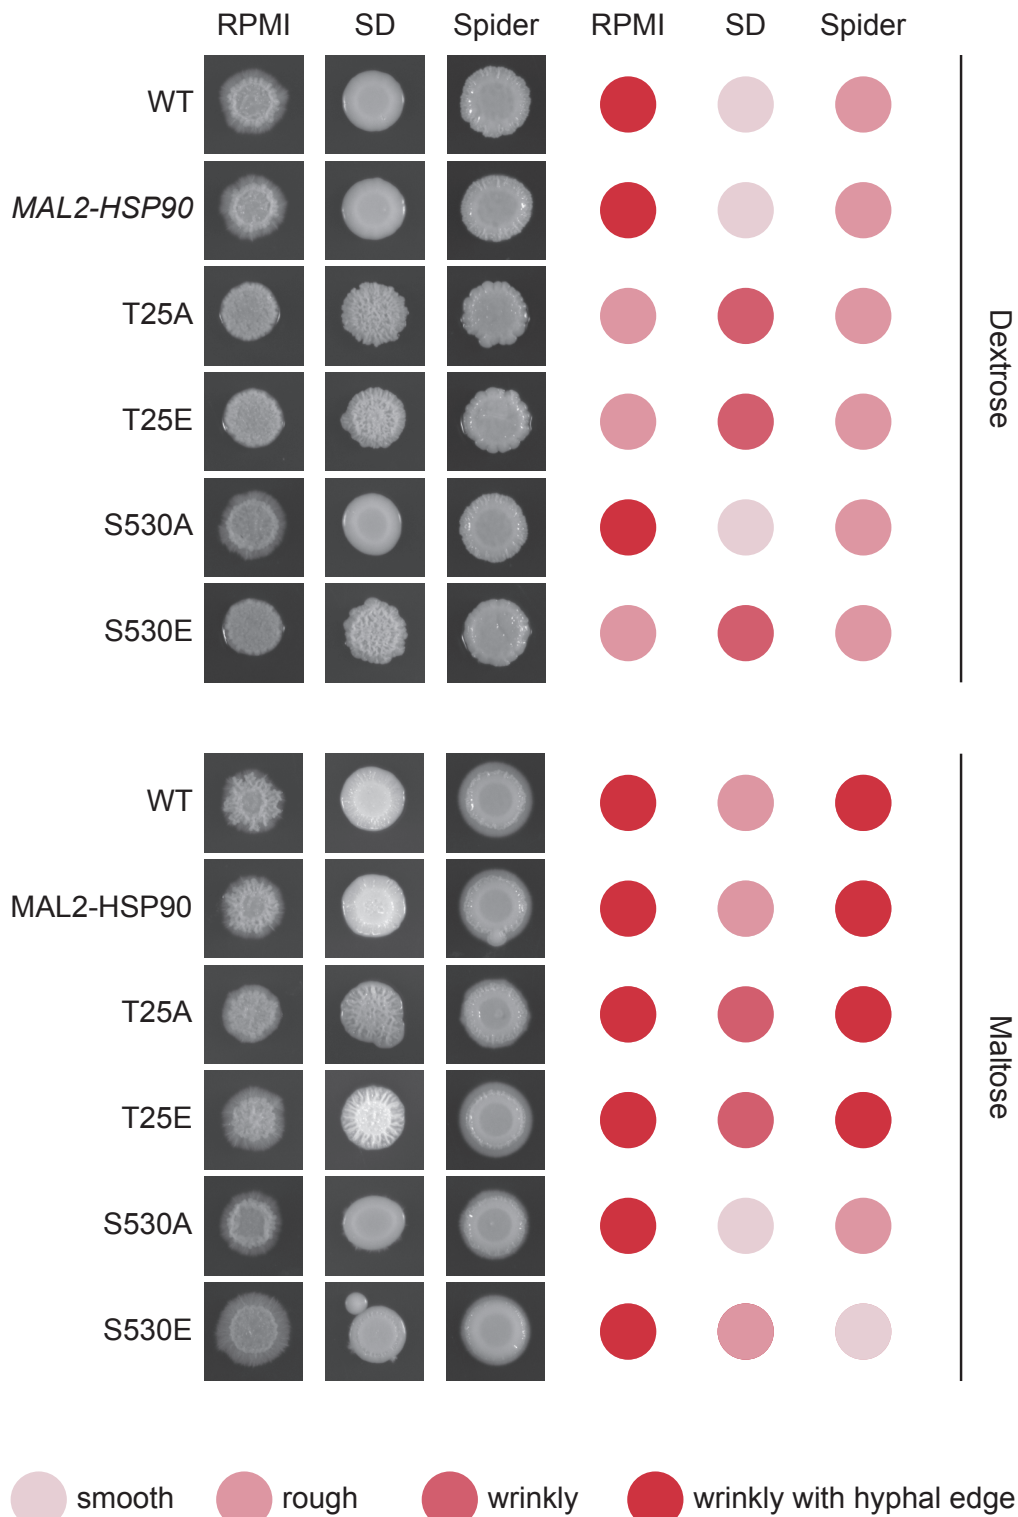

690

691 **Figure 4: Aberrant colony morphology in response to changes in Hsp90 phosphorylation**

692 **patterns.** Images of colonies spotted onto RPMI, Spider or synthetic defined (SD) media

693 containing either dextrose (top) or maltose (bottom). Colonies were scored for their

694 appearance. The darker red the dot, the more extreme the colony phenotype. Shown is one of  
695 two replicates.  
696

Alaalm et al.

Figure 5

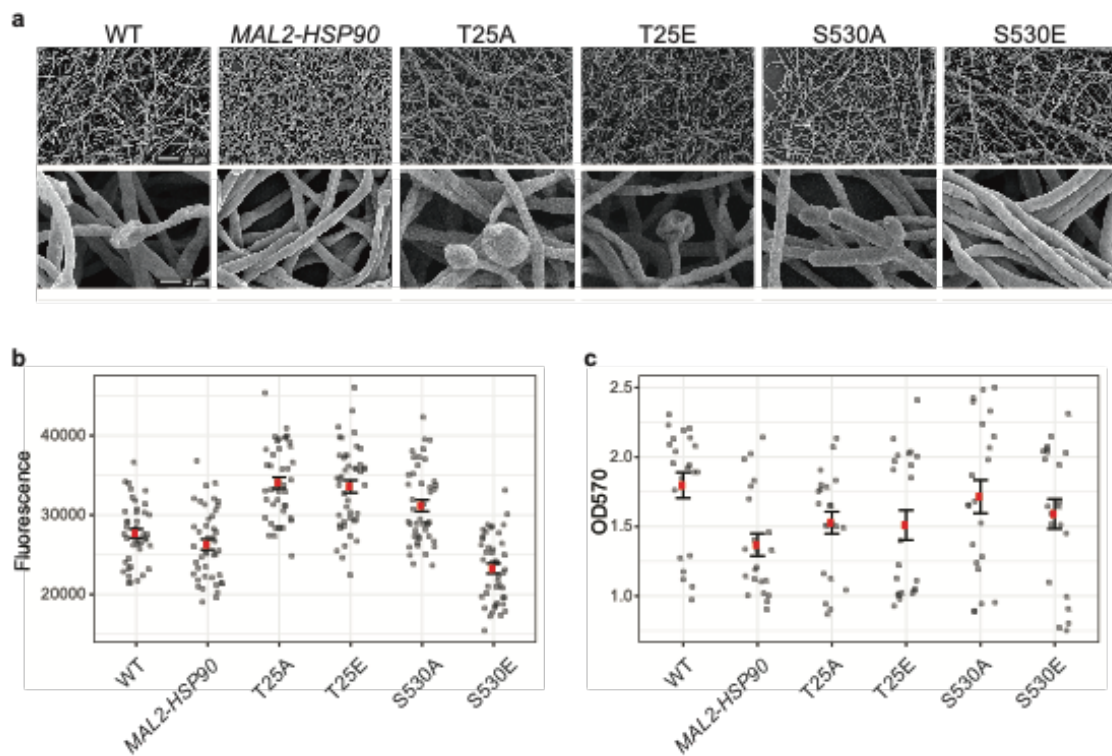

697

698 **Figure 5: Biofilm architecture remains unaffected by Hsp90 phosphorylation. a)**

699 Scanning electron microscopy images of mature biofilms at 800x (top) and 8,000x (bottom)

700 magnification reveal biofilm architecture between the wild type, the control and the phospho-

701 mutants to be indistinguishable upon visual inspection. b) Biofilm cell viability, measured as

702 fluorescence for 44 replicates per strain, is significantly reduced in strain S530E. c) Metabolic

703 biomass measurements for 22 replicates per strain as absorption at OD<sub>570</sub> were comparable to

704 the promoter control.

705

706 **Table 1: Patterns of Hsp90 phosphorylation (P) detected in the wild type (WT) and the**  
707 **CK2 mutants.**

*C. albicans* genotypes

| Hsp90 site | WT | <i>cka1</i> Δ/Δ | <i>cka2</i> Δ/Δ | <i>ckb1</i> Δ/Δ | <i>ckb2</i> Δ/Δ |
|------------|----|-----------------|-----------------|-----------------|-----------------|
| S279       | -  | P               | -               | -               | -               |
| S294       | P  | P               | P               | P               | P               |
| S530       | P  | P               | -               | P               | -               |

708
